# Supplementary material
Source: PubMed Central journal article supplement (PMC8364872)

Figure 1A

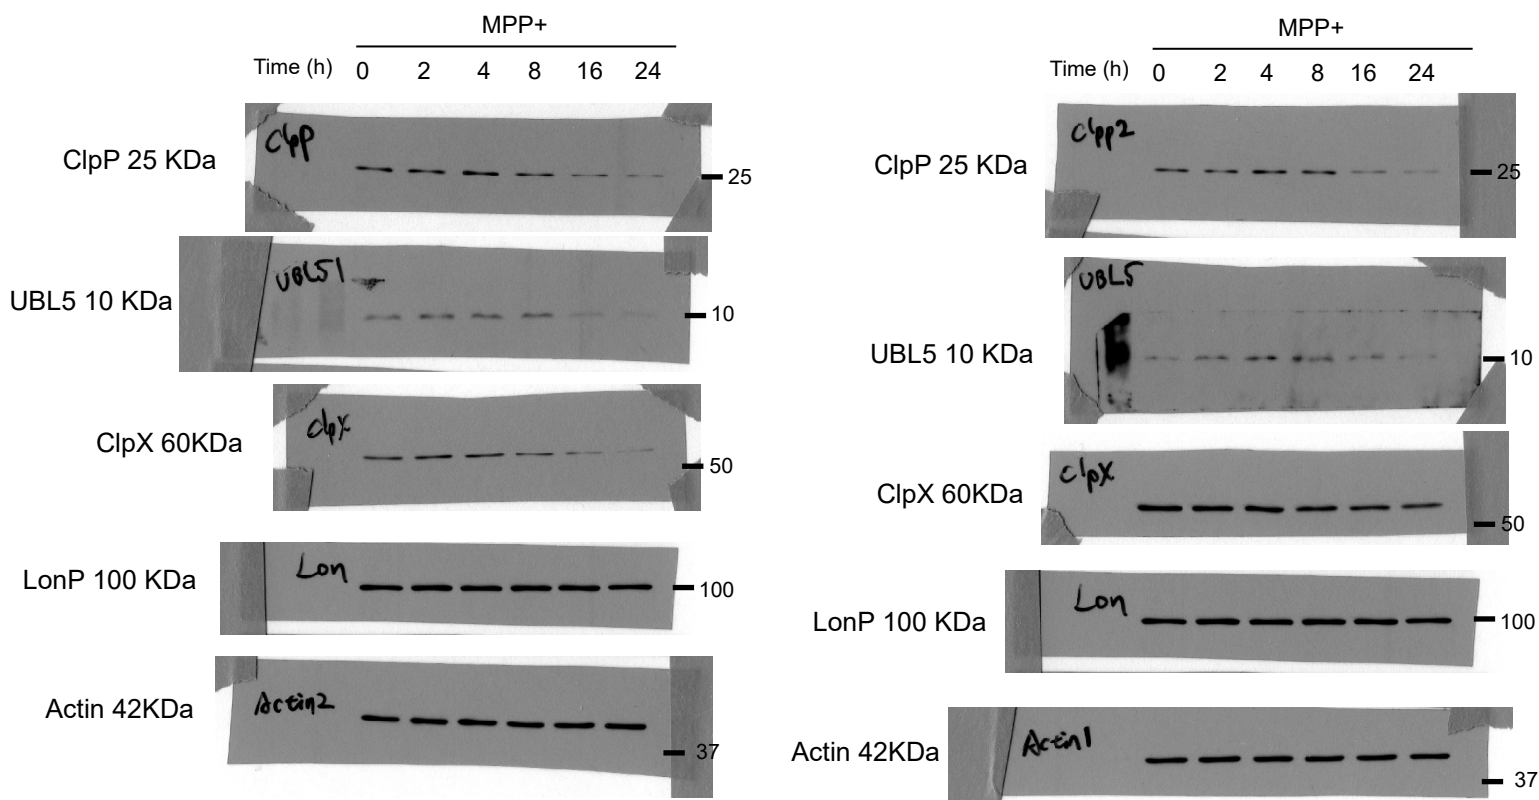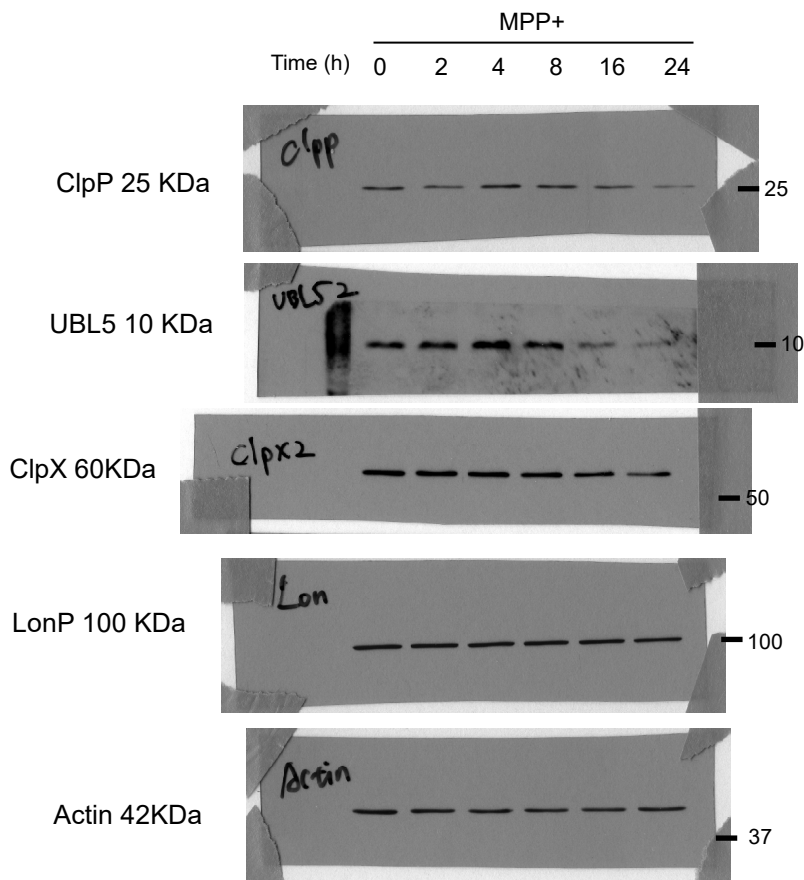

Figure 2B

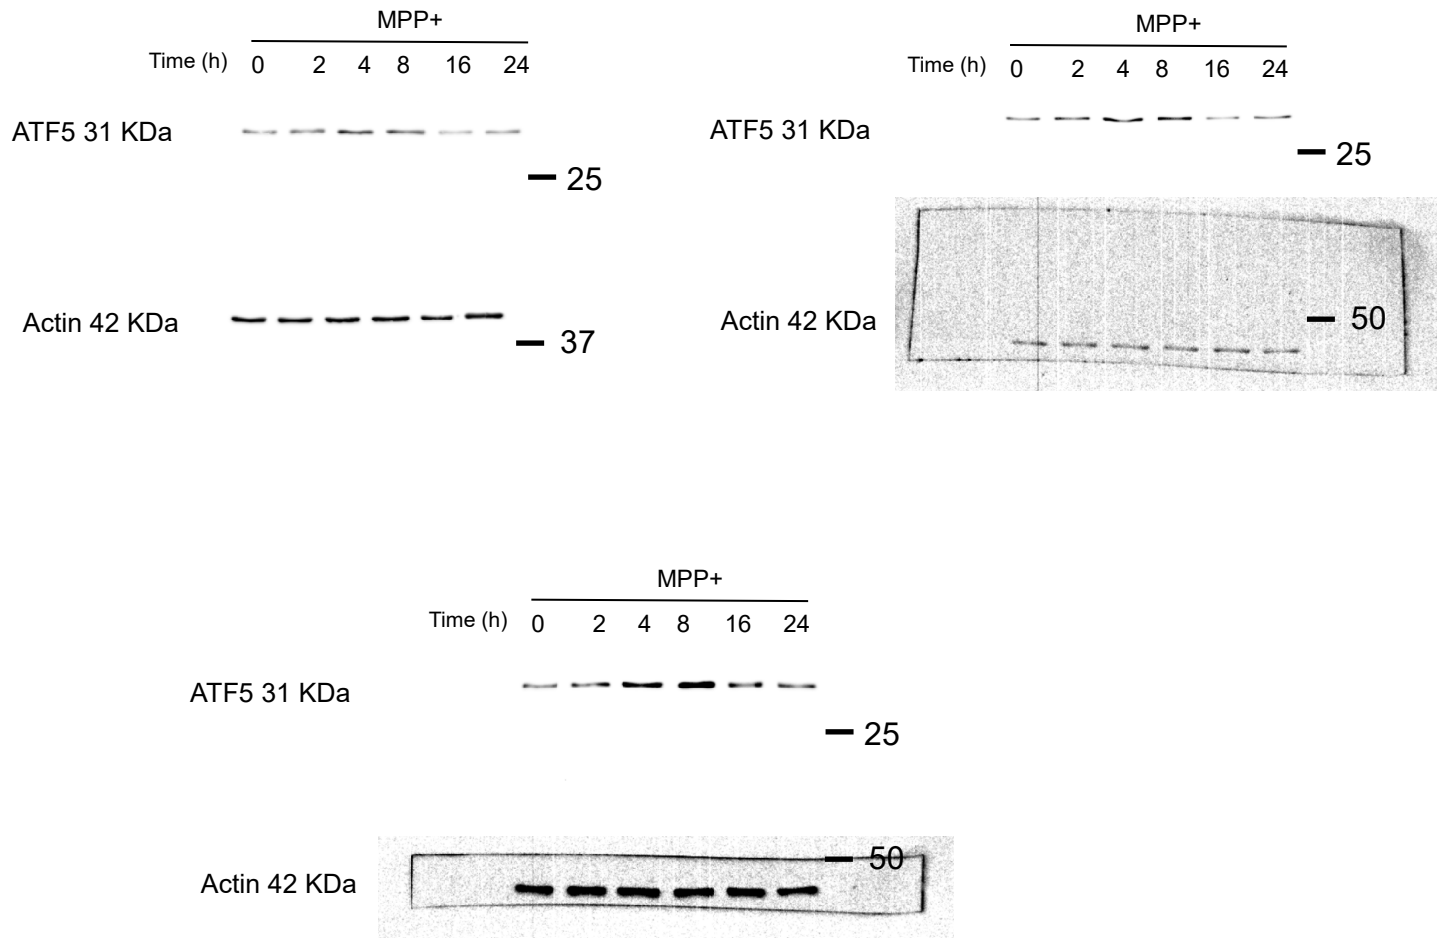

Figure 3A

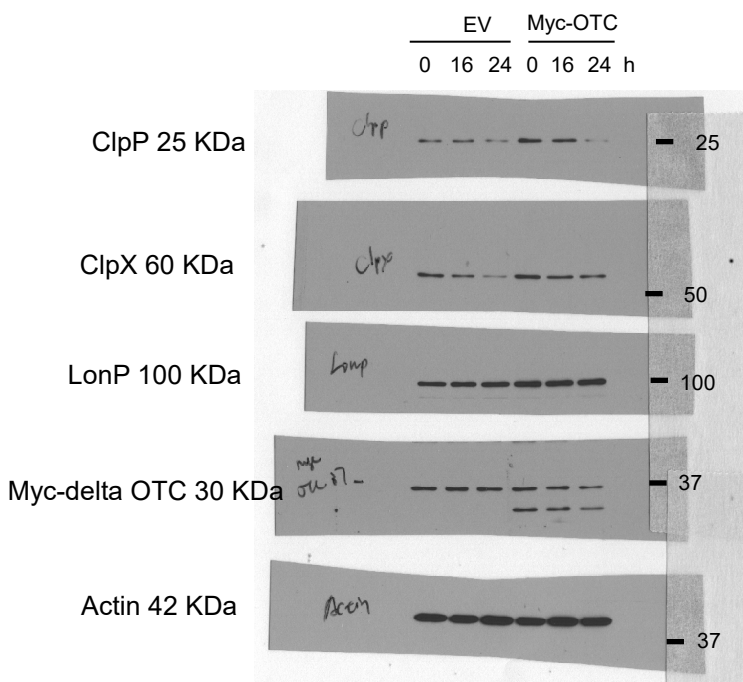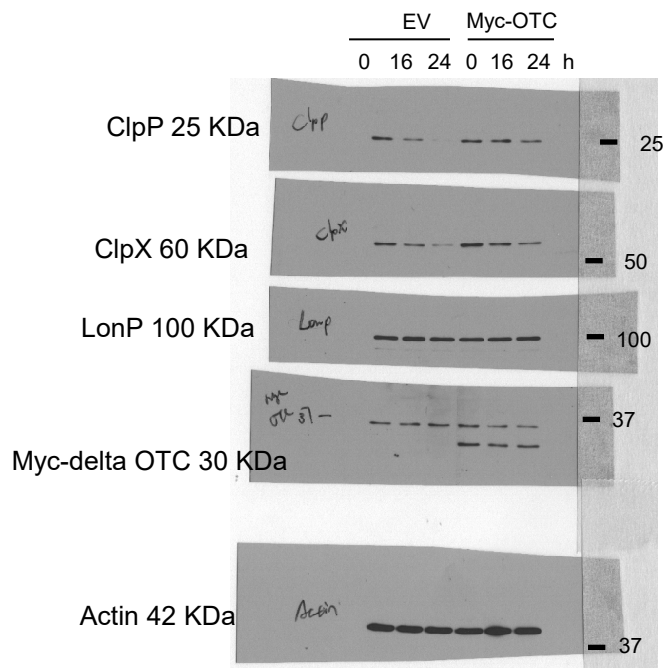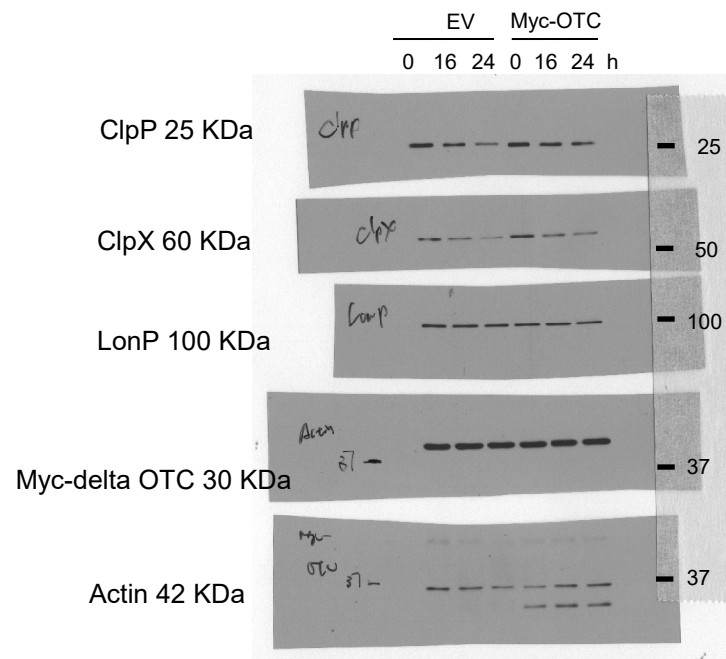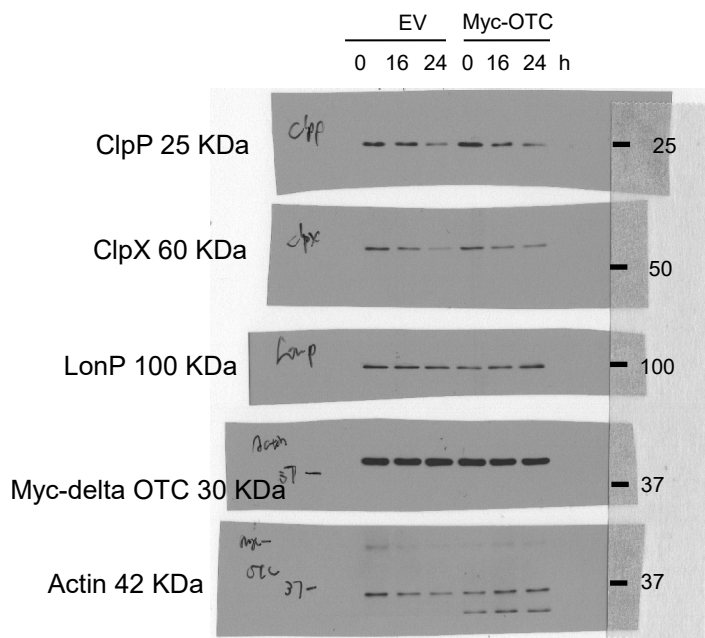

Figure 4A

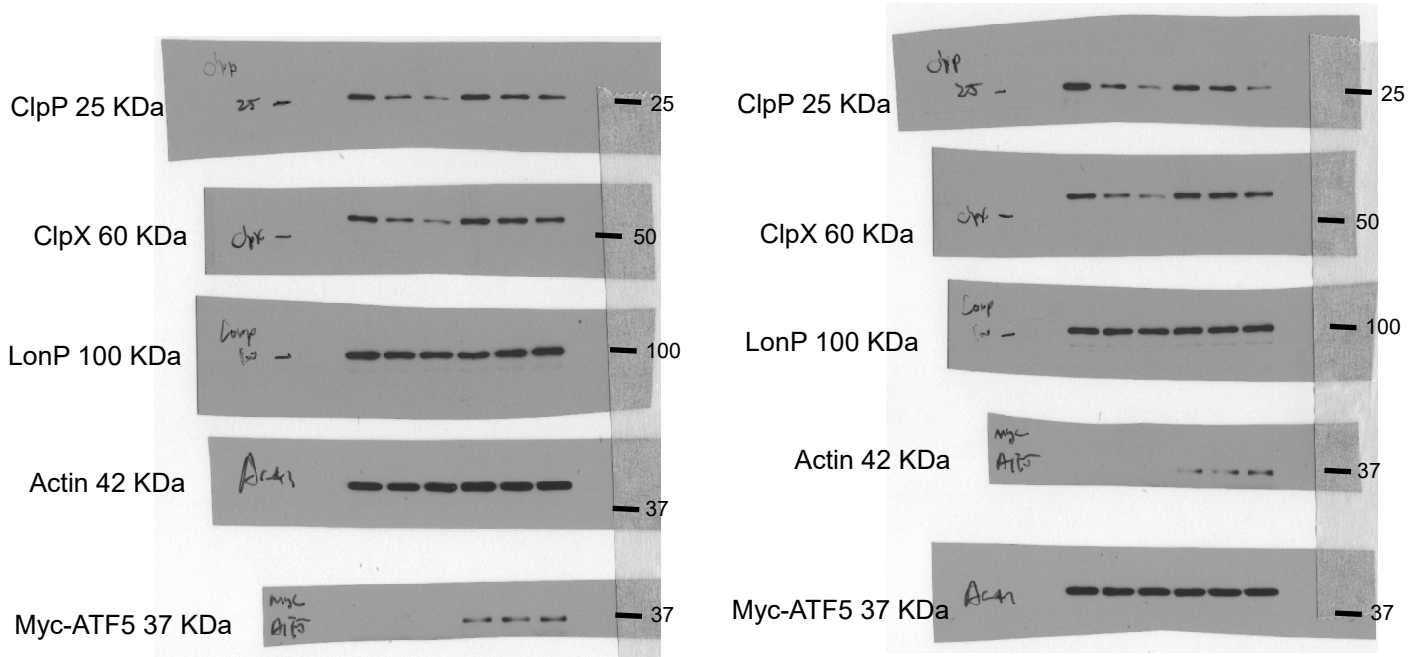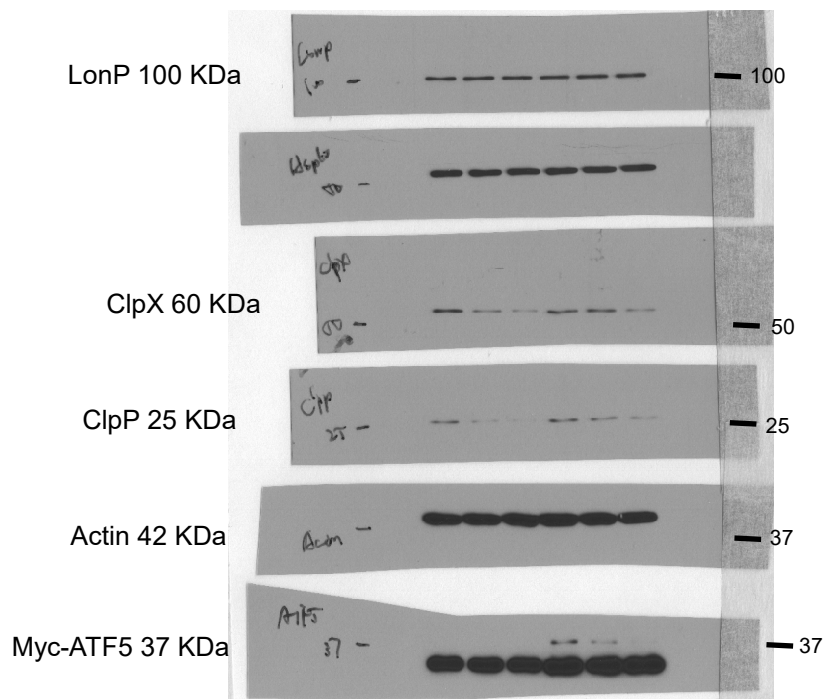

Supplement: NIHMS1720660-supplement-1.pdf [file NIHMS1720660-supplement-1.pdf]
